# Supplementary material for: Novel Hydrogen Sulfide (H2S)-Releasing BW-HS-101 and Its Non-H2S Releasing Derivative in Modulation of Microscopic and Molecular Parameters of Gastric Mucosal Barrier
Source: MDPI journal article supplement (doi:10.3390/ijms22105211), 2021-05-14
Supplement: s1 [file s1]

## Target Prediction data for BW-HS-101

## SwissTargetPrediction

| Target                                                | Common name                                         | Uniprot ID                                               | ChEMBL ID     | Target Class                        | Probability*   | Known actives (3D/2D) |
|-------------------------------------------------------|-----------------------------------------------------|----------------------------------------------------------|---------------|-------------------------------------|----------------|-----------------------|
| Vanilloid receptor                                    | TRPV1                                               | Q8NER1                                                   | CHEMBL4794    | Voltage-gated ion channel           | 0.100578902067 | 342 / 0               |
| Rho-associated protein kinase 2                       | ROCK2                                               | O75116                                                   | CHEMBL2973    | Kinase                              | 0.100578902067 | 80 / 0                |
| Muscarinic acetylcholine receptor M1 (by homology)    | CHRM1                                               | P11229                                                   | CHEMBL216     | Family A G protein-coupled receptor | 0.100578902067 | 116 / 0               |
| Leucine-rich repeat serine/threonine-protein kinase 2 | LRRK2                                               | Q5S007                                                   | CHEMBL1075104 | Kinase                              | 0.100578902067 | 78 / 0                |
| Gamma-secretase                                       | PSEN2<br>PSENEN<br>NCSTN<br>APH1A<br>PSEN1<br>APH1B | P49810<br>Q9NZ42<br>Q92542<br>Q96BI3<br>P49768<br>Q8WW43 | CHEMBL2094135 | Protease                            | 0.100578902067 | 227 / 0               |
| Rho-associated protein kinase 1                       | ROCK1                                               | Q13464                                                   | CHEMBL3231    | Kinase                              | 0.100578902067 | 74 / 0                |
| Epoxide hydratase                                     | EPHX2                                               | P34913                                                   | CHEMBL2409    | Protease                            | 0.100578902067 | 278 / 0               |
| Trace amine-associated receptor 1                     | TAAR1                                               | Q96RJ0                                                   | CHEMBL5857    | Family A G protein-coupled receptor | 0.100578902067 | 109 / 0               |
| Protein kinase C gamma (by homology)                  | PRKCG                                               | P05129                                                   | CHEMBL2938    | Kinase                              | 0.100578902067 | 54 / 0                |
| Bromodomain-containing protein 4                      | BRD4                                                | O60885                                                   | CHEMBL1163125 | Reader                              | 0.100578902067 | 106 / 0               |
| Tyrosine-protein kinase ITK/TSK                       | ITK                                                 | Q08881                                                   | CHEMBL2959    | Kinase                              | 0.100578902067 | 42 / 0                |
| Translocator protein (by homology)                    | TSPO                                                | P30536                                                   | CHEMBL5742    | Membrane receptor                   | 0.100578902067 | 477 / 0               |
| Protein kinase C beta                                 | PRKCB                                               | P05771                                                   | CHEMBL3045    | Kinase                              | 0.100578902067 | 16 / 0                |
| Serine/threonine-protein kinase Aurora-B              | AURKB                                               | Q96GD4                                                   | CHEMBL2185    | Kinase                              | 0.100578902067 | 64 / 0                |
| Kinesin-like protein 1                                | KIF11                                               | P52732                                                   | CHEMBL4581    | Other cytosolic protein             | 0.100578902067 | 65 / 0                |
| Serine/threonine-protein kinase Aurora-A              | AURKA                                               | O14965                                                   | CHEMBL4722    | Kinase                              | 0.100578902067 | 95 / 0                |
| Sodium channel protein type V alpha subunit           | SCN5A                                               | Q14524                                                   | CHEMBL1980    | Voltage-gated ion channel           | 0.100578902067 | 23 / 0                |
| Sodium channel protein type II alpha subunit          | SCN2A                                               | Q99250                                                   | CHEMBL4187    | Voltage-gated ion channel           | 0.100578902067 | 30 / 0                |
| Cytochrome P450 11B2                                  | CYP11B2                                             | P19099                                                   | CHEMBL2722    | Cytochrome P450                     | 0.100578902067 | 311 / 0               |
| Adenosine A1 receptor (by                             | ADORA1                                              | P30542                                                   | CHEMBL226     | Family A G protein-coupled receptor | 0.100578902067 | 504 / 0               |

| Target                                             | Common name | Uniprot ID | ChEMBL ID     | Target Class                        | Probability*   | Known actives (3D/2D) |
|----------------------------------------------------|-------------|------------|---------------|-------------------------------------|----------------|-----------------------|
| homology)                                          |             |            |               |                                     |                |                       |
| Neurokinin 1 receptor                              | TACR1       | P25103     | CHEMBL249     | Family A G protein-coupled receptor | 0.100578902067 | 68 / 0                |
| Melanocortin receptor 4                            | MC4R        | P32245     | CHEMBL259     | Family A G protein-coupled receptor | 0.100578902067 | 24 / 0                |
| Poly [ADP-ribose] polymerase-1                     | PARP1       | P09874     | CHEMBL3105    | Enzyme                              | 0.100578902067 | 280 / 0               |
| TGF-beta receptor type I                           | TGFBR1      | P36897     | CHEMBL4439    | Kinase                              | 0.100578902067 | 115 / 0               |
| Signal transducer and activator of transcription 3 | STAT3       | P40763     | CHEMBL4026    | Transcription factor                | 0.100578902067 | 55 / 0                |
| Alkaline phosphatase, tissue-nonspecific isozyme   | ALPL        | P05186     | CHEMBL5979    | Enzyme                              | 0.100578902067 | 44 / 0                |
| Vascular endothelial growth factor receptor 2      | KDR         | P35968     | CHEMBL279     | Kinase                              | 0.100578902067 | 482 / 0               |
| MAP kinase ERK2                                    | MAPK1       | P28482     | CHEMBL4040    | Kinase                              | 0.100578902067 | 56 / 0                |
| Potassium channel subfamily K member 3             | KCNK3       | O14649     | CHEMBL2321613 | Voltage-gated ion channel           | 0.100578902067 | 37 / 0                |
| Potassium channel subfamily K member 9             | KCNK9       | Q9NPC2     | CHEMBL2321614 | Voltage-gated ion channel           | 0.100578902067 | 28 / 0                |
| MAP kinase p38 alpha                               | MAPK14      | Q16539     | CHEMBL260     | Kinase                              | 0.100578902067 | 531 / 0               |
| Mixed lineage kinase 7                             | MAP3K20     | Q9NYL2     | CHEMBL3886    | Kinase                              | 0.100578902067 | 5 / 0                 |
| Tyrosine-protein kinase ABL2                       | ABL2        | P42684     | CHEMBL4014    | Kinase                              | 0.100578902067 | 2 / 0                 |
| TGF-beta receptor type II                          | TGFBR2      | P37173     | CHEMBL4267    | Kinase                              | 0.100578902067 | 5 / 0                 |
| Carnitine O-palmitoyltransferase 1, liver isoform  | CPT1A       | P50416     | CHEMBL1293194 | Enzyme                              | 0.100578902067 | 71 / 0                |
| Cholecystokinin B receptor (by homology)           | CCKBR       | P32239     | CHEMBL298     | Family A G protein-coupled receptor | 0.100578902067 | 195 / 0               |
| Phosphodiesterase 10A                              | PDE10A      | Q9Y233     | CHEMBL4409    | Phosphodiesterase                   | 0.100578902067 | 700 / 0               |
| Phosphodiesterase 4B                               | PDE4B       | Q07343     | CHEMBL275     | Phosphodiesterase                   | 0.100578902067 | 90 / 0                |
| Phosphodiesterase 7A                               | PDE7A       | Q13946     | CHEMBL3012    | Phosphodiesterase                   | 0.100578902067 | 80 / 0                |
| Heat shock protein HSP 90-alpha                    | HSP90AA1    | P07900     | CHEMBL3880    | Other cytosolic protein             | 0.100578902067 | 64 / 0                |
| Neuropeptide Y receptor type 5                     | NPY5R       | Q15761     | CHEMBL4561    | Family A G protein-coupled receptor | 0.100578902067 | 261 / 0               |
| Endothelin-converting enzyme 2                     | ECE2        | O60344     | CHEMBL5890    | Protease                            | 0.100578902067 | 2 / 0                 |
| Cyclophilin A (by homology)                        | PPIA        | P62937     | CHEMBL1949    | Isomerase                           | 0.100578902067 | 50 / 0                |

| Target                                                      | Common name                | Uniprot ID                 | ChEMBL ID     | Target Class                        | Probability*   | Known actives (3D/2D) |
|-------------------------------------------------------------|----------------------------|----------------------------|---------------|-------------------------------------|----------------|-----------------------|
| Tyrosine-protein kinase JAK3                                | JAK3                       | P52333                     | CHEMBL2148    | Kinase                              | 0.100578902067 | 326 / 0               |
| Tyrosine-protein kinase JAK1                                | JAK1                       | P23458                     | CHEMBL2835    | Kinase                              | 0.100578902067 | 167 / 0               |
| Tyrosine-protein kinase JAK2                                | JAK2                       | O60674                     | CHEMBL2971    | Kinase                              | 0.100578902067 | 343 / 0               |
| JAK3/JAK1                                                   | JAK3 JAK1                  | P52333<br>P23458           | CHEMBL3038491 | Kinase                              | 0.100578902067 | 20 / 0                |
| Cytochrome P450 19A1                                        | CYP19A1                    | P11511                     | CHEMBL1978    | Cytochrome P450                     | 0.100578902067 | 640 / 0               |
| Serine/threonine-protein kinase PIM1                        | PIM1                       | P11309                     | CHEMBL2147    | Kinase                              | 0.100578902067 | 159 / 0               |
| c-Jun N-terminal kinase 1                                   | MAPK8                      | P45983                     | CHEMBL2276    | Kinase                              | 0.100578902067 | 209 / 0               |
| c-Jun N-terminal kinase 3                                   | MAPK10                     | P53779                     | CHEMBL2637    | Kinase                              | 0.100578902067 | 165 / 0               |
| Histamine H3 receptor                                       | HRH3                       | Q9Y5N1                     | CHEMBL264     | Family A G protein-coupled receptor | 0.100578902067 | 95 / 0                |
| Histamine H4 receptor                                       | HRH4                       | Q9H3N8                     | CHEMBL3759    | Family A G protein-coupled receptor | 0.100578902067 | 83 / 0                |
| c-Jun N-terminal kinase 2                                   | MAPK9                      | P45984                     | CHEMBL4179    | Kinase                              | 0.100578902067 | 104 / 0               |
| 11-beta-hydroxysteroid dehydrogenase 1                      | HSD11B1                    | P28845                     | CHEMBL4235    | Enzyme                              | 0.100578902067 | 585 / 0               |
| Serine/threonine-protein kinase PIM2                        | PIM2                       | Q9P1W9                     | CHEMBL4523    | Kinase                              | 0.100578902067 | 98 / 0                |
| Neprilysin (by homology)                                    | MME                        | P08473                     | CHEMBL1944    | Protease                            | 0.100578902067 | 11 / 0                |
| Androgen Receptor                                           | AR                         | P10275                     | CHEMBL1871    | Nuclear receptor                    | 0.100578902067 | 171 / 0               |
| Cyclin-dependent kinase 5/CDK5 activator 1                  | CDK5R1<br>CDK5             | Q15078<br>Q00535           | CHEMBL1907600 | Kinase                              | 0.100578902067 | 178 / 0               |
| Cyclin-dependent kinase 4/cyclin D1                         | CCND1<br>CDK4              | P24385<br>P11802           | CHEMBL1907601 | Kinase                              | 0.100578902067 | 63 / 0                |
| GABA-A receptor; alpha-5/beta-3/gamma-2                     | GABRB3<br>GABRG2<br>GABRA5 | P28472<br>P18507<br>P31644 | CHEMBL2094122 | Ligand-gated ion channel            | 0.100578902067 | 147 / 0               |
| Cathepsin K                                                 | CTSK                       | P43235                     | CHEMBL268     | Protease                            | 0.100578902067 | 293 / 0               |
| CaM kinase II                                               | CAMK2D                     | Q13557                     | CHEMBL2801    | Kinase                              | 0.100578902067 | 6 / 0                 |
| Protein kinase C alpha                                      | PRKCA                      | P17252                     | CHEMBL299     | Kinase                              | 0.100578902067 | 43 / 0                |
| Cyclin-dependent kinase 1                                   | CDK1                       | P06493                     | CHEMBL308     | Kinase                              | 0.100578902067 | 70 / 0                |
| Protein kinase C epsilon                                    | PRKCE                      | Q02156                     | CHEMBL3582    | Kinase                              | 0.100578902067 | 4 / 0                 |
| MAP kinase-interacting serine/threonine-protein kinase MNK1 | MKNK1                      | Q9BUB5                     | CHEMBL4718    | Kinase                              | 0.100578902067 | 15 / 0                |
| Mineralocorticoid receptor                                  | NR3C2                      | P08235                     | CHEMBL1994    | Nuclear receptor                    | 0.100578902067 | 120 / 0               |

| Target                                             | Common name                     | Uniprot ID                           | ChEMBL ID     | Target Class                        | Probability*   | Known actives (3D/2D) |
|----------------------------------------------------|---------------------------------|--------------------------------------|---------------|-------------------------------------|----------------|-----------------------|
| Progesterone receptor                              | PGR                             | P06401                               | CHEMBL208     | Nuclear receptor                    | 0.100578902067 | 246 / 0               |
| Hormone sensitive lipase                           | LIPE                            | Q05469                               | CHEMBL3590    | Enzyme                              | 0.100578902067 | 58 / 0                |
| Fibroblast growth factor receptor 1                | FGFR1                           | P11362                               | CHEMBL3650    | Kinase                              | 0.100578902067 | 64 / 0                |
| Estradiol 17-beta-dehydrogenase 3                  | HSD17B3                         | P37058                               | CHEMBL4234    | Enzyme                              | 0.100578902067 | 41 / 0                |
| Tyrosine-protein kinase BRK                        | PTK6                            | Q13882                               | CHEMBL4601    | Kinase                              | 0.100578902067 | 20 / 0                |
| Caspase-3                                          | CASP3                           | P42574                               | CHEMBL2334    | Protease                            | 0.100578902067 | 85 / 0                |
| Nitric-oxide synthase, brain                       | NOS1                            | P29475                               | CHEMBL3568    | Enzyme                              | 0.100578902067 | 85 / 0                |
| Quinone reductase 2                                | NQO2                            | P16083                               | CHEMBL3959    | Enzyme                              | 0.100578902067 | 56 / 0                |
| Nitric oxide synthase, inducible                   | NOS2                            | P35228                               | CHEMBL4481    | Enzyme                              | 0.100578902067 | 129 / 0               |
| Nitric-oxide synthase, endothelial                 | NOS3                            | P29474                               | CHEMBL4803    | Enzyme                              | 0.100578902067 | 27 / 0                |
| Cytochrome P450 11B1                               | CYP11B1                         | P15538                               | CHEMBL1908    | Cytochrome P450                     | 0.100578902067 | 248 / 0               |
| Adenosine A2a receptor                             | ADORA2A                         | P29274                               | CHEMBL251     | Family A G protein-coupled receptor | 0.100578902067 | 355 / 0               |
| Cytochrome P450 24A1 (by homology)                 | CYP24A1                         | Q07973                               | CHEMBL4521    | Enzyme                              | 0.100578902067 | 4 / 0                 |
| Serotonin 2b (5-HT2b) receptor                     | HTR2B                           | P41595                               | CHEMBL1833    | Family A G protein-coupled receptor | 0.100578902067 | 104 / 0               |
| GABA receptor alpha-1 subunit (by homology)        | GABRA1                          | P14867                               | CHEMBL1962    | Ligand-gated ion channel            | 0.100578902067 | 31 / 0                |
| Cyclin-dependent kinase 1/cyclin B                 | CCNB3<br>CDK1<br>CCNB1<br>CCNB2 | Q8WWL7<br>P06493<br>P14635<br>O95067 | CHEMBL2094127 | Other cytosolic protein             | 0.100578902067 | 117 / 0               |
| PI3-kinase p110-alpha/p85-alpha                    | PIK3CA<br>PIK3R1                | P42336<br>P27986                     | CHEMBL2111367 | Enzyme                              | 0.100578902067 | 11 / 0                |
| Muscarinic acetylcholine receptor M2 (by homology) | CHRM2                           | P08172                               | CHEMBL211     | Family A G protein-coupled receptor | 0.100578902067 | 50 / 0                |
| Serotonin 2c (5-HT2c) receptor                     | HTR2C                           | P28335                               | CHEMBL225     | Family A G protein-coupled receptor | 0.100578902067 | 169 / 0               |
| Glycogen synthase kinase-3 beta                    | GSK3B                           | P49841                               | CHEMBL262     | Kinase                              | 0.100578902067 | 302 / 0               |
| PI3-kinase p110-alpha subunit                      | PIK3CA                          | P42336                               | CHEMBL4005    | Enzyme                              | 0.100578902067 | 158 / 0               |
| GABA receptor alpha-5 subunit (by homology)        | GABRA5                          | P31644                               | CHEMBL5112    | Ligand-gated ion channel            | 0.100578902067 | 24 / 0                |
| Toll-like receptor (TLR7/TLR9)                     | TLR9                            | Q9NR96                               | CHEMBL5804    | Toll-like and Il-1 receptors        | 0.100578902067 | 32 / 0                |
| Pyruvate kinase                                    | PKM                             | P14618                               | CHEMBL1075189 | Enzyme                              | 0.100578902067 | 36 / 0                |

| Target                                                        | Common name            | Uniprot ID                 | ChEMBL ID     | Target Class                        | Probability*   | Known actives (3D/2D) |
|---------------------------------------------------------------|------------------------|----------------------------|---------------|-------------------------------------|----------------|-----------------------|
| isozymes M1/M2                                                |                        |                            |               |                                     |                |                       |
| Serine/threonine-protein kinase RAF                           | RAF1                   | P04049                     | CHEMBL1906    | Kinase                              | 0.100578902067 | 50 / 0                |
| Beta-secretase 1                                              | BACE1                  | P56817                     | CHEMBL4822    | Protease                            | 0.100578902067 | 311 / 0               |
| Muscarinic acetylcholine receptor M4                          | CHRM4                  | P08173                     | CHEMBL1821    | Family A G protein-coupled receptor | 0.100578902067 | 18 / 0                |
| Vascular endothelial growth factor receptor 1                 | FLT1                   | P17948                     | CHEMBL1868    | Kinase                              | 0.100578902067 | 122 / 0               |
| Muscarinic acetylcholine receptor M5                          | CHRM5                  | P08912                     | CHEMBL2035    | Family A G protein-coupled receptor | 0.100578902067 | 16 / 0                |
| Carbonic anhydrase II                                         | CA2                    | P00918                     | CHEMBL205     | Lyase                               | 0.100578902067 | 467 / 0               |
| Cyclin-dependent kinase 2/cyclin E                            | CCNE2<br>CDK2<br>CCNE1 | O96020<br>P24941<br>P24864 | CHEMBL2094126 | Other cytosolic protein             | 0.100578902067 | 76 / 0                |
| Dual-specificity tyrosine-phosphorylation regulated kinase 1A | DYRK1A                 | Q13627                     | CHEMBL2292    | Kinase                              | 0.100578902067 | 103 / 0               |
