# Supplementary material for: Novel Hydrogen Sulfide (H2S)-Releasing BW-HS-101 and Its Non-H2S Releasing Derivative in Modulation of Microscopic and Molecular Parameters of Gastric Mucosal Barrier
Source: MDPI journal article supplement (doi:10.3390/ijms22105211), 2021-05-14
Supplement: s1 [file s1]

## SwissTargetPrediction

| Target                                          | Common name     | Uniprot ID       | ChEMBL ID     | Target Class                        | Probability*   | Known actives (3D/2D) |
|-------------------------------------------------|-----------------|------------------|---------------|-------------------------------------|----------------|-----------------------|
| Protein tyrosine kinase 2 beta                  | PTK2B           | Q14289           | CHEMBL5469    | Kinase                              | 0.100578902067 | 2 / 0                 |
| Aldehyde dehydrogenase                          | ALDH2           | P05091           | CHEMBL1935    | Oxidoreductase                      | 0.100578902067 | 0 / 1                 |
| c-Jun N-terminal kinase 3                       | MAPK10          | P53779           | CHEMBL2637    | Kinase                              | 0.100578902067 | 12 / 0                |
| Cytochrome P450 11B2                            | CYP11B2         | P19099           | CHEMBL2722    | Cytochrome P450                     | 0.100578902067 | 23 / 0                |
| G-protein coupled bile acid receptor 1          | GPBAR1          | Q8TDU6           | CHEMBL5409    | Family A G protein-coupled receptor | 0.100578902067 | 15 / 0                |
| Glutaminy-peptide cyclotransferase-like protein | QPCTL           | Q9NXS2           | CHEMBL3638349 | Transferase                         | 0.100578902067 | 6 / 0                 |
| Serotonin 5a (5-HT5a) receptor                  | HTR5A           | P47898           | CHEMBL3426    | Family A G protein-coupled receptor | 0.100578902067 | 23 / 0                |
| Butyrylcholinesterase                           | BCHE            | P06276           | CHEMBL1914    | Hydrolase                           | 0.100578902067 | 16 / 0                |
| Poly [ADP-ribose] polymerase-1                  | PARP1           | P09874           | CHEMBL3105    | Enzyme                              | 0.100578902067 | 37 / 0                |
| Kinesin-like protein 1                          | KIF11           | P52732           | CHEMBL4581    | Other cytosolic protein             | 0.100578902067 | 17 / 0                |
| Hepatocyte growth factor receptor               | MET             | P08581           | CHEMBL3717    | Kinase                              | 0.100578902067 | 11 / 0                |
| Metabotropic glutamate receptor 1               | GRM1            | Q13255           | CHEMBL3772    | Family C G protein-coupled receptor | 0.100578902067 | 4 / 0                 |
| Isocitrate dehydrogenase [NADP] cytoplasmic     | IDH1            | O75874           | CHEMBL2007625 | Enzyme                              | 0.100578902067 | 4 / 0                 |
| Tyrosine-protein kinase JAK3                    | JAK3            | P52333           | CHEMBL2148    | Kinase                              | 0.100578902067 | 106 / 0               |
| NAD-dependent deacetylase sirtuin 2             | SIRT2           | Q8IXJ6           | CHEMBL4462    | Eraser                              | 0.100578902067 | 7 / 18                |
| Nischarin                                       | NISCH           | Q9Y211           | CHEMBL3923    | Other cytosolic protein             | 0.100578902067 | 48 / 0                |
| Glutamate NMDA receptor; GRIN1/GRIN2B           | GRIN1<br>GRIN2B | Q05586<br>Q13224 | CHEMBL1907603 | Ligand-gated ion channel            | 0.100578902067 | 13 / 0                |
| Alpha-2b adrenergic receptor                    | ADRA2B          | P18089           | CHEMBL1942    | Family A G protein-coupled receptor | 0.100578902067 | 84 / 0                |
| Epoxide hydratase                               | EPHX2           | P34913           | CHEMBL2409    | Protease                            | 0.100578902067 | 17 / 0                |
| Intercellular adhesion molecule-1               | ICAM1           | P05362           | CHEMBL3070    | Adhesion                            | 0.100578902067 | 2 / 0                 |
| Selectin E                                      | SELE            | P16581           | CHEMBL3890    | Adhesion                            | 0.100578902067 | 2 / 0                 |
| Thymidylate synthase                            | TYMS            | P04818           | CHEMBL1952    | Transferase                         | 0.100578902067 | 50 / 0                |
| Beta-secretase 1                                | BACE1           | P56817           | CHEMBL4822    | Protease                            | 0.100578902067 | 109 / 0               |
| Toll-like receptor 8                            | TLR8            | Q9NR97           | CHEMBL5805    | Toll-like and Il-1 receptors        | 0.100578902067 | 1 / 0                 |
| Focal adhesion kinase 1                         | PTK2            | Q05397           | CHEMBL2695    | Kinase                              | 0.100578902067 | 8 / 0                 |
| Delta opioid receptor                           | OPRD1           | P41143           | CHEMBL236     | Family A G protein-                 | 0.100578902067 | 24 / 0                |

| Target                                          | Common name | Uniprot ID | ChEMBL ID  | Target Class                        | Probability*   | Known actives (3D/2D) |
|-------------------------------------------------|-------------|------------|------------|-------------------------------------|----------------|-----------------------|
|                                                 |             |            |            | coupled receptor                    |                |                       |
| Mu opioid receptor                              | OPRM1       | P35372     | CHEMBL233  | Family A G protein-coupled receptor | 0.100578902067 | 18 / 0                |
| Adenosine A2b receptor                          | ADORA2B     | P29275     | CHEMBL255  | Family A G protein-coupled receptor | 0.100578902067 | 3 / 0                 |
| Vascular endothelial growth factor receptor 2   | KDR         | P35968     | CHEMBL279  | Kinase                              | 0.100578902067 | 45 / 0                |
| Cyclin-dependent kinase 2                       | CDK2        | P24941     | CHEMBL301  | Kinase                              | 0.100578902067 | 4 / 0                 |
| Cyclin-dependent kinase 1                       | CDK1        | P06493     | CHEMBL308  | Kinase                              | 0.100578902067 | 12 / 0                |
| Voltage-gated potassium channel subunit Kv1.5   | KCNA5       | P22460     | CHEMBL4306 | Voltage-gated ion channel           | 0.100578902067 | 7 / 0                 |
| Alpha-1d adrenergic receptor                    | ADRA1D      | P25100     | CHEMBL223  | Family A G protein-coupled receptor | 0.0            | 36 / 0                |
| Alpha-1b adrenergic receptor                    | ADRA1B      | P35368     | CHEMBL232  | Family A G protein-coupled receptor | 0.0            | 34 / 0                |
| Serine/threonine-protein kinase 17B             | STK17B      | O94768     | CHEMBL3980 | Kinase                              | 0.0            | 12 / 0                |
| Estradiol 17-beta-dehydrogenase 3               | HSD17B3     | P37058     | CHEMBL4234 | Enzyme                              | 0.0            | 12 / 0                |
| Serine/threonine-protein kinase 17A             | STK17A      | Q9UEE5     | CHEMBL4525 | Kinase                              | 0.0            | 12 / 0                |
| Trace amine-associated receptor 1 (by homology) | TAAR1       | Q96RJ0     | CHEMBL5857 | Family A G protein-coupled receptor | 0.0            | 94 / 0                |
| Phospholipase A2 group IIA                      | PLA2G2A     | P14555     | CHEMBL3474 | Enzyme                              | 0.0            | 11 / 0                |
| C-X-C chemokine receptor type 3                 | CXCR3       | P49682     | CHEMBL4441 | Family A G protein-coupled receptor | 0.0            | 25 / 0                |
| GlutaminyI-peptide cyclotransferase             | QPCT        | Q16769     | CHEMBL4508 | Enzyme                              | 0.0            | 51 / 0                |
| Muscarinic acetylcholine receptor M5            | CHRM5       | P08912     | CHEMBL2035 | Family A G protein-coupled receptor | 0.0            | 3 / 0                 |
| Dopamine D1 receptor                            | DRD1        | P21728     | CHEMBL2056 | Family A G protein-coupled receptor | 0.0            | 16 / 0                |
| Muscarinic acetylcholine receptor M2            | CHRM2       | P08172     | CHEMBL211  | Family A G protein-coupled receptor | 0.0            | 3 / 0                 |
| Muscarinic acetylcholine receptor M1            | CHRM1       | P11229     | CHEMBL216  | Family A G protein-coupled receptor | 0.0            | 7 / 0                 |
| Serine/threonine-protein kinase Aurora-B        | AURKB       | Q96GD4     | CHEMBL2185 | Kinase                              | 0.0            | 7 / 0                 |
| Tyrosine-protein kinase SRC                     | SRC         | P12931     | CHEMBL267  | Kinase                              | 0.0            | 15 / 0                |
| ALK tyrosine kinase receptor                    | ALK         | Q9UM73     | CHEMBL4247 | Kinase                              | 0.0            | 6 / 0                 |
| Serine/threonine-                               | NEK6        | Q9HC98     | CHEMBL4309 | Kinase                              | 0.0            | 1 / 0                 |

| Target                                     | Common name                     | Uniprot ID                           | ChEMBL ID     | Target Class                        | Probability* | Known actives (3D/2D) |
|--------------------------------------------|---------------------------------|--------------------------------------|---------------|-------------------------------------|--------------|-----------------------|
| protein kinase NEK6                        |                                 |                                      |               |                                     |              |                       |
| Uridine phosphorylase 1 (by homology)      | UPP1                            | Q16831                               | CHEMBL4811    | Enzyme                              | 0.0          | 12 / 0                |
| Sodium/hydrogen exchanger 1                | SLC9A1                          | P19634                               | CHEMBL2781    | Electrochemical transporter         | 0.0          | 14 / 0                |
| Serotonin 1d (5-HT1d) receptor             | HTR1D                           | P28221                               | CHEMBL1983    | Family A G protein-coupled receptor | 0.0          | 18 / 0                |
| Serotonin 7 (5-HT7) receptor               | HTR7                            | P34969                               | CHEMBL3155    | Family A G protein-coupled receptor | 0.0          | 25 / 0                |
| Cytochrome P450 26A1                       | CYP26A1                         | O43174                               | CHEMBL5141    | Cytochrome P450                     | 0.0          | 2 / 0                 |
| Cyclin-dependent kinase 5/CDK5 activator 1 | CDK5R1<br>CDK5                  | Q15078<br>Q00535                     | CHEMBL1907600 | Kinase                              | 0.0          | 20 / 0                |
| Cyclin-dependent kinase 1/cyclin B         | CCNB3<br>CDK1<br>CCNB1<br>CCNB2 | Q8WWL7<br>P06493<br>P14635<br>O95067 | CHEMBL2094127 | Other cytosolic protein             | 0.0          | 14 / 0                |
| Apoptosis regulator Bcl-X                  | BCL2L1                          | Q07817                               | CHEMBL4625    | Other ion channel                   | 0.0          | 1 / 0                 |
| Apoptosis regulator Bcl-2                  | BCL2                            | P10415                               | CHEMBL4860    | Other ion channel                   | 0.0          | 4 / 0                 |
| Prostanoid EP2 receptor                    | PTGER2                          | P43116                               | CHEMBL1881    | Family A G protein-coupled receptor | 0.0          | 0 / 17                |
| Prostanoid EP3 receptor                    | PTGER3                          | P43115                               | CHEMBL3710    | Family A G protein-coupled receptor | 0.0          | 0 / 13                |
| Estradiol 17-beta-dehydrogenase 2          | HSD17B2                         | P37059                               | CHEMBL2789    | Enzyme                              | 0.0          | 27 / 0                |
| Lysine-specific demethylase 4D-like        | KDM4E                           | B2RXH2                               | CHEMBL1293226 | Eraser                              | 0.0          | 1 / 0                 |
| Kappa Opioid receptor                      | OPRK1                           | P41145                               | CHEMBL237     | Family A G protein-coupled receptor | 0.0          | 33 / 0                |
| Cathepsin D                                | CTSD                            | P07339                               | CHEMBL2581    | Protease                            | 0.0          | 2 / 0                 |
| Melanocortin receptor 4                    | MC4R                            | P32245                               | CHEMBL259     | Family A G protein-coupled receptor | 0.0          | 2 / 0                 |
| Dual specificity protein phosphatase 3     | DUSP3                           | P51452                               | CHEMBL2635    | Phosphatase                         | 0.0          | 6 / 0                 |
| Serine/threonine-protein kinase PAK 1      | PAK1                            | Q13153                               | CHEMBL4600    | Kinase                              | 0.0          | 1 / 0                 |
| Serine/threonine-protein kinase Aurora-C   | AURKC                           | Q9UQB9                               | CHEMBL3935    | Kinase                              | 0.0          | 6 / 0                 |
| Serine/threonine-protein kinase Aurora-A   | AURKA                           | O14965                               | CHEMBL4722    | Kinase                              | 0.0          | 7 / 0                 |
| Carbonic anhydrase I                       | CA1                             | P00915                               | CHEMBL261     | Lyase                               | 0.0          | 87 / 0                |
| G-protein coupled receptor 84              | GPR84                           | Q9NQS5                               | CHEMBL3714079 | Family A G protein-coupled receptor | 0.0          | 19 / 0                |
| Nitric oxide synthase, inducible           | NOS2                            | P35228                               | CHEMBL4481    | Enzyme                              | 0.0          | 28 / 0                |

| Target                                                         | Common name                | Uniprot ID                 | ChEMBL ID     | Target Class                        | Probability* | Known actives (3D/2D) |
|----------------------------------------------------------------|----------------------------|----------------------------|---------------|-------------------------------------|--------------|-----------------------|
| Vanilloid receptor                                             | TRPV1                      | Q8NER1                     | CHEMBL4794    | Voltage-gated ion channel           | 0.0          | 39 / 0                |
| Muscarinic acetylcholine receptor M4                           | CHRM4                      | P08173                     | CHEMBL1821    | Family A G protein-coupled receptor | 0.0          | 2 / 0                 |
| Tyrosine-protein kinase JAK2                                   | JAK2                       | O60674                     | CHEMBL2971    | Kinase                              | 0.0          | 81 / 0                |
| Cytochrome P450 2C19                                           | CYP2C19                    | P33261                     | CHEMBL3622    | Cytochrome P450                     | 0.0          | 2 / 0                 |
| Calcium-activated potassium channel subunit alpha-1            | KCNMA1                     | Q12791                     | CHEMBL4304    | Voltage-gated ion channel           | 0.0          | 11 / 0                |
| Voltage-gated potassium channel subunit Kv1.3                  | KCNA3                      | P22001                     | CHEMBL4633    | Voltage-gated ion channel           | 0.0          | 7 / 0                 |
| Glycogen synthase kinase-3 beta                                | GSK3B                      | P49841                     | CHEMBL262     | Kinase                              | 0.0          | 11 / 0                |
| Nitric-oxide synthase, brain                                   | NOS1                       | P29475                     | CHEMBL3568    | Enzyme                              | 0.0          | 29 / 0                |
| Nitric-oxide synthase, endothelial                             | NOS3                       | P29474                     | CHEMBL4803    | Enzyme                              | 0.0          | 11 / 0                |
| Aldehyde dehydrogenase 1A1 (by homology)                       | ALDH1A1                    | P00352                     | CHEMBL3577    | Enzyme                              | 0.0          | 1 / 0                 |
| Dihydropyrimidine dehydrogenase                                | DPYD                       | Q12882                     | CHEMBL3172    | Enzyme                              | 0.0          | 1 / 0                 |
| Carbonic anhydrase VI                                          | CA6                        | P23280                     | CHEMBL3025    | Lyase                               | 0.0          | 3 / 0                 |
| Phosphodiesterase 10A (by homology)                            | PDE10A                     | Q9Y233                     | CHEMBL4409    | Phosphodiesterase                   | 0.0          | 13 / 0                |
| Serotonin 2a (5-HT2a) receptor (by homology)                   | HTR2A                      | P28223                     | CHEMBL224     | Family A G protein-coupled receptor | 0.0          | 31 / 25               |
| Receptor protein-tyrosine kinase erbB-2                        | ERBB2                      | P04626                     | CHEMBL1824    | Kinase                              | 0.0          | 14 / 0                |
| Epidermal growth factor receptor erbB1                         | EGFR                       | P00533                     | CHEMBL203     | Kinase                              | 0.0          | 46 / 0                |
| 5-lipoxygenase activating protein                              | ALOX5AP                    | P20292                     | CHEMBL4550    | Other cytosolic protein             | 0.0          | 10 / 0                |
| GABA-A receptor; alpha-5/beta-3/gamma-2                        | GABRB3<br>GABRG2<br>GABRA5 | P28472<br>P18507<br>P31644 | CHEMBL2094122 | Ligand-gated ion channel            | 0.0          | 5 / 0                 |
| Fibroblast growth factor receptor 1                            | FGFR1                      | P11362                     | CHEMBL3650    | Kinase                              | 0.0          | 9 / 0                 |
| PH domain leucine-rich repeat-containing protein phosphatase 2 | PHLPP2                     | Q6ZVD8                     | CHEMBL1275209 | Enzyme                              | 0.0          | 1 / 0                 |
| Macrophage migration inhibitory factor                         | MIF                        | P14174                     | CHEMBL2085    | Enzyme                              | 0.0          | 5 / 0                 |
| Serine-protein kinase                                          | ATR                        | Q13535                     | CHEMBL5024    | Kinase                              | 0.0          | 3 / 0                 |

| Target                                           | Common name | Uniprot ID | ChEMBL ID  | Target Class                        | Probability* | Known actives (3D/2D) |
|--------------------------------------------------|-------------|------------|------------|-------------------------------------|--------------|-----------------------|
| ATR                                              |             |            |            |                                     |              |                       |
| Peroxisome proliferator-activated receptor gamma | PPARG       | P37231     | CHEMBL235  | Nuclear receptor                    | 0.0          | 0 / 100               |
| Peroxisome proliferator-activated receptor delta | PPARD       | Q03181     | CHEMBL3979 | Nuclear receptor                    | 0.0          | 0 / 27                |
| Tubulin beta-1 chain                             | TUBB1       | Q9H4B7     | CHEMBL1915 | Structural protein                  | 0.0          | 3 / 0                 |
| Histamine H3 receptor                            | HRH3        | Q9Y5N1     | CHEMBL264  | Family A G protein-coupled receptor | 0.0          | 57 / 0                |
| Histamine H4 receptor                            | HRH4        | Q9H3N8     | CHEMBL3759 | Family A G protein-coupled receptor | 0.0          | 43 / 0                |
| 3-phosphoinositide dependent protein kinase-1    | PDPK1       | O15530     | CHEMBL2534 | Kinase                              | 0.0          | 4 / 0                 |
